# Supplementary material
Source: PubMed Central journal article supplement (PMC8030843)
Supplement: JCH-20-1220-s001.pdf [file JCH-20-1220-s001.pdf]

## Appendix A – Search Terms

### Medline

- 1 chlorides/ or potassium chloride/ or sodium chloride/ (110384)
- 2 Salts/ (12384)
- 3 (sodium or chloride\* or salt or salts or Na).tw,kw. (532478)
- 4 1 or 2 or 3 (599066)
- 5 ((dietar\* or chloride\* or intake\* or food\* or consumption or consume\*) adj5 sodium).tw,kw. (31697)
- 6 ((dietar\* or chloride\* or intake\* or food\* or consumption or consume\*) adj5 salt).tw,kw. (9121)
- 7 ((dietar\* or chloride\* or intake\* or food\* or consumption or consume\*) adj5 Na).tw,kw. (2515)
- 8 5 or 6 or 7 (40141)
- 9 ((24-hr\* or 24hr\* or 24 hour\* or 24hour\*) adj5 urin\*).tw,kw. (8801)
- 10 urine.fs. (200058)
- 11 analysis.fs. (1801499)
- 12 9 or 10 or 11 (1970407)
- 13 ((sodium or salt\* or Na) adj5 (excret\* or urin\* or retention\* or balanc\* or storage or output\*).tw,kw. (32656)
- 14 4 and 8 and 12 and 13 (3007)

### Embase

- 1 chlorides/ or potassium chloride/ or sodium chloride/ (249573)
- 2 Salts/ (6748)
- 3 (sodium or chloride\* or salt or salts or Na).tw,kw. (614270)
- 4 1 or 2 or 3 (785735)
- 5 ((dietar\* or chloride\* or intake\* or food\* or consumption or consume\*) adj5 sodium).tw,kw. (36202)
- 6 ((dietar\* or chloride\* or intake\* or food\* or consumption or consume\*) adj5 salt).tw,kw. (10987)
- 7 ((dietar\* or chloride\* or intake\* or food\* or consumption or consume\*) adj5 Na).tw,kw. (2900)
- 8 5 or 6 or 7 (46170)
- 9 ((24-hr\* or 24hr\* or 24 hour\* or 24hour\*) adj5 urin\*).tw,kw. (13267)
- 10 Urine/ or urinary excretion/ (197722)
- 11 sodium retention/ (3580)
- 12 9 or 10 or 11 (208568)
- 13 ((sodium or salt\* or Na) adj5 (excret\* or urin\* or retention\* or balanc\* or storage or output\*).tw,kw. (36117)
- 14 4 and 8 and 12 and 13 (2493)

### Cochrane Trials

- 1 chlorides/ or potassium chloride/ or sodium chloride/ (2503)
- 2 Salts/ (54)
- 3 (sodium or chloride\* or salt or salts or Na).tw,kw. (23655)
- 4 1 or 2 or 3 (25326)
- 5 ((dietar\* or chloride\* or intake\* or food\* or consumption or consume\*) adj5 sodium).tw,kw. (4038)
- 6 ((dietar\* or chloride\* or intake\* or food\* or consumption or consume\*) adj5 salt).tw,kw. (651)
- 7 ((dietar\* or chloride\* or intake\* or food\* or consumption or consume\*) adj5 Na).tw,kw. (137)
- 8 5 or 6 or 7 (4465)

- 9 ((24-hr\* or 24hr\* or 24 hour\* or 24hour\*) adj5 urin\*).tw,kw. (1487)
- 10 Urine/ or urinary excretion/ (588)
- 11 Urin\*.tw,kw. (32798)
- 12 sodium retention/ (0)
- 13 9 or 10 or 11 or 12 (32950)
- 14 ((sodium or salt\* or Na) adj5 (excret\* or urin\* or retention\* or balanc\* or storage or output\*).tw,kw.. (3100)
- 15 4 and 8 and 13 and 14 (725)

#### Cochrane Systematic

- 1 (sodium or chloride\* or salt or salts).mp. (1264)
- 2 ((dieta\* or chloride\* or intake\* or food\* or consumption or consume\*) adj5 sodium).mp. (195)
- 3 ((dieta\* or chloride\* or intake\* or food\* or consumption or consume\*) adj5 salt).mp. (107)
- 4 ((dieta\* or chloride\* or intake\* or food\* or consumption or consume\*) adj5 Na).mp. (6)
- 5 2 or 3 or 4 (268)
- 6 ((24-hr\* or 24hr\* or 24 hour\* or 24hour\*) adj5 urin\*).mp. (111)
- 7 Urin\*.mp. (1700)
- 8 ((sodium or salt\* or Na) adj5 (excret\* or urin\* or retention\* or balanc\* or storage or output\*)).mp. (131)
- 9 6 or 7 (1700)
- 10 1 and 5 and 8 and 9 (40)

#### WHO Clinical Trials Database

- (Sodium or salt) or (diet\* or food\* or intake or consum\*) - Title
- Or
- (Sodium or salt) or (diet\* or food\* or intake or consum\*) - Condition
- Or
- (Sodium or salt) or (diet\* or food\* or intake or consum\*) - Intervention
- (489)

## Appendix B – Study Characteristic

| First author, year | Country         | Population characteristics                           | Population health risks/status   | Age range or average age (years) | Study Design                | Sodium Intervention Duration | Washout Time Between Dietary Intervention Periods | Sample Size |        |       | Mean sodium ingested (mmol/day)                                                  | Met additional criteria for rigorous methodology |
|--------------------|-----------------|------------------------------------------------------|----------------------------------|----------------------------------|-----------------------------|------------------------------|---------------------------------------------------|-------------|--------|-------|----------------------------------------------------------------------------------|--------------------------------------------------|
|                    |                 |                                                      |                                  |                                  |                             |                              |                                                   | Male        | Female | Total |                                                                                  |                                                  |
| Akita, 2003        | USA             | None stated                                          | Hypertension                     | 22                               | Randomized control trial    | 30 days                      | 0 days                                            | NA          | NA     | 412   | 50<br>100<br>150                                                                 | No                                               |
| Birukov, 2016      | Russia          | Healthy male volunteers                              | None                             | 34.3 +/- 5.2, 31.5 +/- 5         | Control trial               | 105, and 205 days            | NA                                                | 12          | 0      | 12    | 12, 9, 12, 6 grams per day (individual outputs not given for each sodium intake) | Yes                                              |
| Breslau, 1983      | USA             | Normal volunteers                                    | None                             | 22-36                            | Randomized crossover trials | 10 days                      | 0 days                                            | 6           | 5      | 11    | 10<br>250                                                                        | No                                               |
| Buckley, 1994      | UK              | None stated                                          | Hypertension                     | 48.7 +/- 2.3                     | Randomized crossover        | 5 days                       | 0 days                                            | 5           | 7      | 12    | 10<br>350                                                                        | No                                               |
| Buren, 1992        | The Netherlands | Healthy subjects                                     | None                             | none stated                      | Control trial               | 4 days                       | NA                                                | NA          | NA     | 21    | 100<br>150                                                                       | No                                               |
| Buren, 1993        | The Netherlands | Healthy volunteers                                   | None                             | 18-22                            | Crossover trial             | 8 days                       | 2-8 weeks                                         | 4           | 2      | 6     | 10<br>100<br>400                                                                 | No                                               |
| Chan, 1996         | China           | Male Chinese subjects                                | None                             | 21-31                            | Crossover trial             | 5 days                       | 0 days                                            | 7           | 0      | 7     | 20<br>220                                                                        | No                                               |
| Dahl, 1995         | Canada          | Male volunteers with no medications or GI problems   | None                             | 25.3 +/- 2.3                     | Randomized crossover trial  | 3 weeks                      | 0 days                                            | 10          | 0      | 10    | 160<br>150                                                                       | Yes                                              |
| Evans, 1997        | United Kingdom  | Pre and postmenopausal women                         | None                             | 22-70                            | Randomized control trial    | 1 week                       | 0 days                                            | 0           | 22     | 22    | 50<br>300                                                                        | No                                               |
| Feng, 2016         | China           | newly diagnosed hypertensive patients                | Hypertension                     | 27-52                            | Control trial               | 10 days                      | NA                                                | 74          | 51     | 125   | 173.91                                                                           | No                                               |
| Gill, 1988         | USA             | Hypertensive patients, normotensive controls         | Hypertension                     | 20-75                            | Crossover trial             | 7 days                       | 0 days                                            | 12          | 17     | 29    | 109                                                                              | No                                               |
| Gijsbeers, 2015    | The Netherlands | Non-smoking men and women aged 40-80.                | None                             | 65.8                             | Randomized control trial    | 4 weeks                      | 0 days                                            | 24          | 12     | 36    | 87<br>217.5                                                                      | No                                               |
| Heer, 1993         | Germany         | Non-smoking male patients                            | None                             | 24 +/- 1                         | Crossover trial             | 8 days                       | 0 days                                            | 6           | 0      | 6     | 220<br>440<br>660                                                                | No                                               |
| Herrin, 1986       | NA              | Healthy volunteers                                   | None                             | 24-63                            | Randomized control trial    | 7 days                       | NA                                                | NA          | NA     | 5     | 65                                                                               | No                                               |
| Imafuku, 1990      | Japan           | Normotensive males                                   | None                             | 21-39                            | Crossover trial             | 3 and 4 days                 | 0 days                                            | 7           | 0      | 7     | 34.9                                                                             | No                                               |
| Kawano, 2004       | Japan           | Japanese males with hypertension and drinking habits | Hypertension                     | 54 +/- 2                         | Control trial               | 13 days                      | NA                                                | 14          | 0      | 14    | 120                                                                              | No                                               |
| Keane, 1991        | Canada          | Medical patients                                     | None                             | 42 +/- 2                         | Crossover trial             | 5 days                       | 0 days                                            | 13          | 24     | 37    | 10<br>100                                                                        | No                                               |
| Lawton 1988        | USA             | None stated                                          | Hypertension and normal subjects | 24.8 +/- 1.1 and 24.3 +/- 0.6    | Randomized crossover        | 6 days                       | 3-4 weeks                                         | 22          | 0      | 22    | 8.5<br>380                                                                       | No                                               |
| Luft, 1982         | USA             | Black and white men and women                        | None                             | 19-54                            | Randomized crossover trial  | 5 days                       | NA                                                | 22          | 21     | 43    | 150                                                                              | No                                               |
| Luft. 1983         | USA             | Black and white men                                  | None                             | 19-32                            | Randomized control trial    | 7 days                       | NA                                                | 24          | 0      | 24    | 10<br>200<br>400                                                                 | No                                               |
| Manitius, 1985     | Poland          | Men with benign hypertension                         | Hypertension                     | 20-41                            | Crossover trial             | 5 days                       | 0 days                                            | 12          | 0      | 12    | 80<br>280                                                                        | No                                               |

| First author, year     | Country         | Population characteristics                                              | Population health risks/status   | Age range or average age (years) | Study Design               | Sodium Intervention Duration | Washout Time Between Dietary Intervention Periods | Sample Size |        |       | Mean sodium ingested (mmol/day) | Met additional criteria for rigorous methodology |
|------------------------|-----------------|-------------------------------------------------------------------------|----------------------------------|----------------------------------|----------------------------|------------------------------|---------------------------------------------------|-------------|--------|-------|---------------------------------|--------------------------------------------------|
|                        |                 |                                                                         |                                  |                                  |                            |                              |                                                   | Male        | Female | Total |                                 |                                                  |
| McKnight, 1994         | United Kingdom  | Hypertensive men                                                        | Hypertension                     | 34-50                            | Crossover trial            | 6 days                       | 0 days                                            | 8           | 0      | 8     | 12<br>250                       | No                                               |
| Ogihara, 1988          | Japan           | Patients in an outpatient clinic                                        | Hypertension                     | 56 +/- 3                         | Crossover trial            | 5 days                       | 0 days                                            | 4           | 6      | 10    | 33.9                            | No                                               |
| Overlack, 1993         | Germany         | None stated                                                             | None                             | 38 +/- 1.2                       | randomized crossover       | 7 days                       | 0 days                                            | 98          | 65     | 163   | 20<br>300                       | No                                               |
| Roos, 1985             | The Netherlands | None stated                                                             | None                             | 21-26                            | Crossover trial            | 5 days                       | 2 days                                            | 5           | 3      | 8     | 20<br>200                       | No                                               |
| Sagnella, 1989         | United Kingdom  | Young, normotensive subjects                                            | None                             | 19-21                            | Crossover trial            | 4 days                       | NA                                                | 4           | 2      | 6     | 10                              | No                                               |
| Sakhaee, 1993          | USA             | Normal volunteers with no renal or heart disease.                       | None                             | 29                               | Crossover trial            | 7 days                       | Unclear                                           | 6           | 8      | 14    | 50<br>300                       | No                                               |
| Sanchez-Castillo, 1987 | United Kingdom  | Healthy male volunteers                                                 | None                             | NA                               | Control trial              | 34 days                      | NA                                                | 5           | 0      | 5     | 144                             | Yes                                              |
| Schwartz, 1992         | USA             | Sons of hypertensive parents and sons of non-hypertensive patients      | None                             | 41 +/- 4 and 47 +/- 5            | crossover trial            | 7 days                       | 0 days                                            | 22          | 0      | 22    | 10<br>200                       | No                                               |
| Sharma, 1990           | Germany         | None stated                                                             | None                             | 20-31                            | randomized crossover       | 3 weeks                      | 0 days                                            | 15          | 0      | 15    | 20<br>220                       | No                                               |
| Shore, 1998 A          | United Kingdom  | Patients with no history of renal or heart disease                      | None                             | NA                               | Randomized crossover trial | 5 days                       | 0 days                                            | NA          | NA     | 6     | 10<br>122                       | No                                               |
| Shore, 1988 B          | United Kingdom  | Healthy volunteers                                                      | None                             | 18-24                            | Randomized crossover trial | 12 days                      | 3 days                                            | 8           | 1      | 9     | 150                             | No                                               |
| Sowers, 1988           | USA             | Normotensive and hypertensive black adults                              | Hypertension                     | 34 +/- 6 and 44 +/- 8            | Crossover trial            | 14 days                      | 0 days                                            | NA          | NA     | 25    | 40<br>180                       | No                                               |
| Vaughan, 1997          | USA             | Free living caucasian males                                             | Hypertension                     | 50 +/- 10                        | Randomized control trial   | 6 weeks                      | NA                                                | NA          | NA     | 15    | 143.48                          | No                                               |
| Yamakawa, 1992         | Japan           | Normotensive subjects with and without a family history of hypertension | None                             | 20-22                            | Crossover trial            | 7 days                       | 0 days                                            | NA          | NA     | 14    | 101.7                           | No                                               |
| Allsopp, 1998          | United Kingdom  | None stated                                                             | None                             | 18-40                            | Randomized control trial   | 8 days                       | 0 days                                            | 25          | 0      | 25    | 348.4<br>66.3<br>174.1<br>348.4 | No                                               |
| Armstrong, 1985        | USA             | College aged males with no record of regular exercise                   | None                             | None stated                      | Randomized crossover trial | 16 days                      | 24 days                                           | 8           | 0      | 8     | 98<br>399                       | No                                               |
| Mueller, 1995          | USA             | None stated                                                             | Some patients with hypertension. | None stated                      | Randomized crossover trial | 3 and 4 days                 | 0 days                                            | NA          | NA     | 30    | 176<br>44                       | No                                               |
| Parfrey, 1981          | United Kingdom  | Patients with essential hypertension, normotensive controls             | Hypertension                     | None stated                      | Crossover trial            | 5 days                       | 0 days                                            | 45          | 60     | 105   | 10<br>350                       | No                                               |
